# Supplementary material for: The Fate of Sulfur Radical Cation of N-Acetyl-Methionine: Deprotonation vs. Decarboxylation
Source: MDPI journal article supplement (doi:10.3390/photochem3010007), 2023-02-05
Supplement: s1 [file s1]

## Supplementary Information (SI)

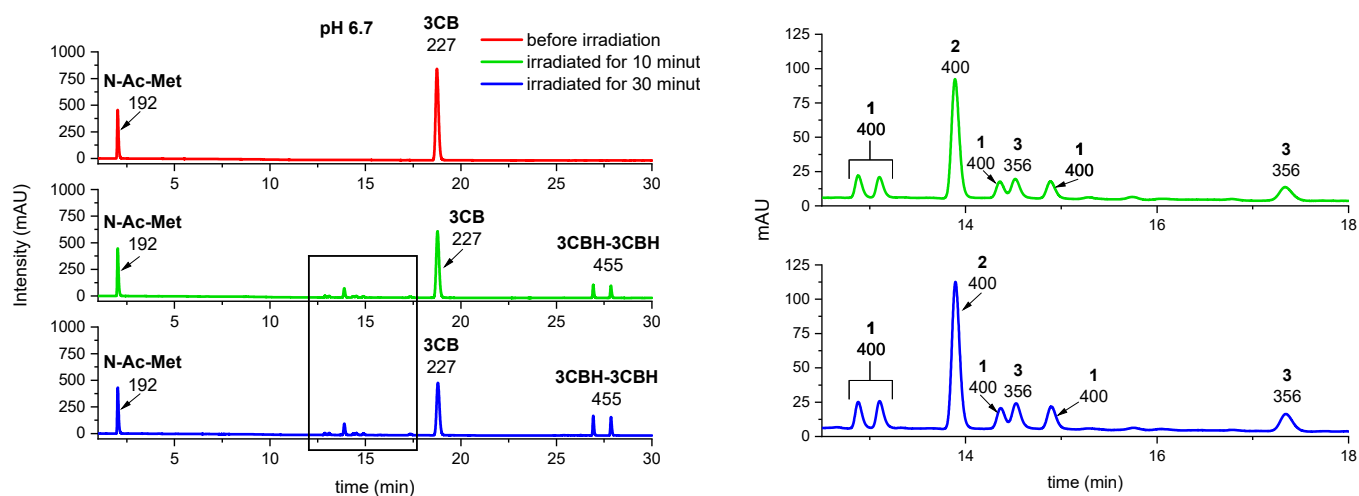

**Figure S1.** HPLC chromatograms of aqueous solutions containing: N-Ac-Met (20 mM) and 3CB (4.5 mM) at pH 6.7 before irradiation (top panel, red), after 10-minute irradiation (middle panel, green) and after 30-minute irradiation (bottom panel, blue). The expansion of the chromatograms after irradiation between 12 and 18 minutes is shown next to the chromatograms. Peaks are labelled with m/z of the  $[M+H]^+$  or  $[M+H-H_2O]^+$  ions of the acquired MS spectrum.

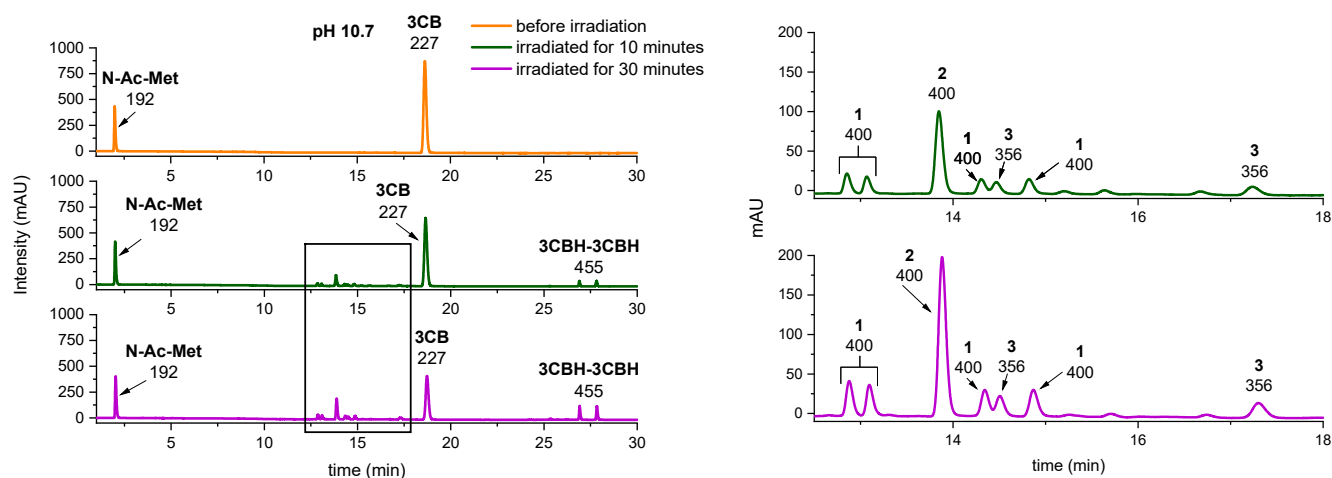

**Figure S2.** HPLC chromatograms of aqueous solutions containing: N-Ac-Met (20 mM) and 3CB (4.5 mM) at pH 10.7 before irradiation (top panel, orange), after 10-minute irradiation (middle panel, dark green) and after 30-minute irradiation (bottom panel, purple). The expansion of the chromatograms after irradiation between 12 and 18 minutes is shown next to the chromatograms. Peaks are labelled with m/z of the  $[M+H]^+$  or  $[M+H-H_2O]^+$  ions of the acquired MS spectrum.

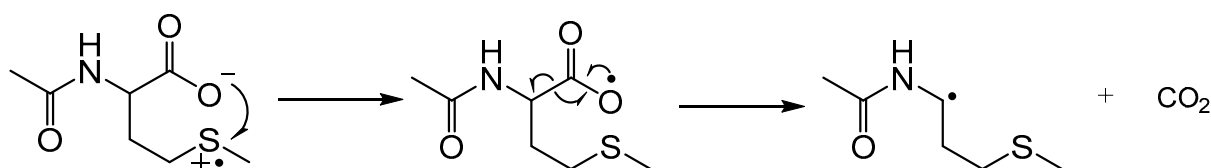

**Figure S3.** The mechanism of the pseudo-Kolbe reaction.

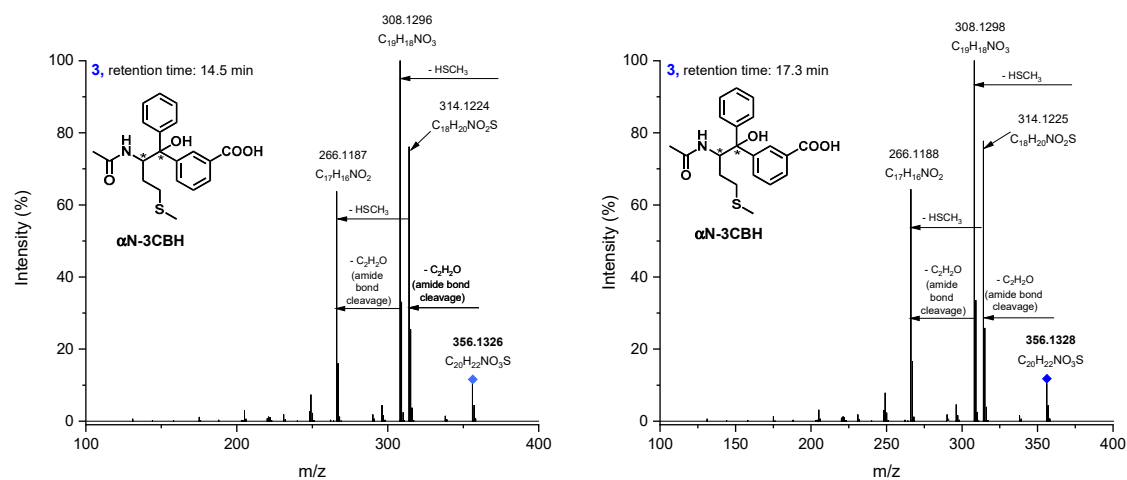

**Figure S4.** MSMS spectra of photoproducts **3** at retention time 14.5 and 17.3 min.
